# Supplementary material for: The energy of fcc and hcp foams
Source: Royal Society of Chemistry journal article supplement (doi:10.1039/d0sm00820f), 2020-01-01
Supplement: d0sm00820f1.pdf [file d0sm00820f1.pdf]

**Electronic Supplementary Information for Soft Matter  
manuscript:  
The energy of fcc and hcp foams.**

S. Hutzler,<sup>a‡</sup> F.F. Dunne,<sup>a</sup> A.M. Kraynik,<sup>a,b</sup> and D. Weaire<sup>a</sup>

<sup>a</sup>*School of Physics, Trinity College Dublin, The University of Dublin,  
Ireland.*

<sup>b</sup>*Retired from Sandia National Laboratories, Albuquerque, USA.*

<sup>‡</sup>Corresponding author, email: stefan.hutzler@tcd.ie

**SUPPLEMENTAL MATERIAL**

**S1 Variation of Plateau border radius between two nodes for the case of a Kelvin foam**

In subsection 5.2.1 we have derived a functional form for the variation of the Plateau border radius  $r(x)$  between two nodes in a dry foam. We have tested the applicability of this form using Surface Evolver data for the familiar case of a Kelvin foam, in which all nodes are of the tetrahedral type. In this case eqn. (18) reduces to

$$\delta(x) = 2\alpha e^{-\frac{L}{2c_1 r_0}} \cosh\left(\frac{x-L}{2c_1 r_0}\right). \quad (\text{S-1})$$

Figure S1 shows numerical Surface Evolver data for the longitudinal variation of Plateau border radius  $r(x)$  for liquid fraction  $\phi = 0.01$  and  $\phi = 0.04$ , respectively. Away from the two nodes the data is well described by the functional form of eqns. (15) and (S-1).

The fitted value for the node constant  $\alpha$  depends critically on the value of  $L$  in eqn. (18). Taking  $L$  as the edge length of a Kelvin foam would for our simple model lead to an overlap of the Plateau borders close to a node. We may define a shortened effective Plateau border length via the meeting point of two Plateau borders, as modelled by eqn. (15). The shortening is then given by  $2\Delta_\alpha$ , with  $\Delta_\alpha = r_0(1+\alpha)/(\alpha/c_1 + \sqrt{3}\tan(\theta_\alpha/2))$ , where  $\theta_\alpha = \arccos(-1/3) = 109.47^\circ$  is the vertex angle in the Kelvin foam.

A least square fit of the Plateau border profile then results in  $\alpha \simeq 0.9$ . This value is roughly consistent with the estimate of  $\alpha \simeq 0.56$ , as obtained from the variation of excess energy with liquid fraction, see Appendix S2.3. A fit without the above length correction results in  $\alpha \simeq 2.5$ .

Estimate of node constants can in principle also be obtained from approximations of the vertex geometry, but we have not pursued this.

**S2 Evaluation of constants in the energy expansions of dry foams**

We will in the following evaluate the numerical constants  $E_{dry}$ ,  $E_1$ ,  $E_2$  and  $E_3$  in the energy expansion of eqn. (23), i.e.

$$E(\phi)/(4\pi R^2) = E_{dry} - E_1\sqrt{\phi} + E_2\phi \left(1 - \exp\left[-E_3/\sqrt{\phi}\right]\right), \quad (\text{S-2})$$

for the cases of a single bubble of volume  $\frac{4}{3}R^3\pi$  arranged in an fcc foam (S2.1) and in a Kelvin (S2.3) foam, respectively. We will use the lowest order expression eqn. (19) to relate liquid fraction  $\phi$  to the asymptotic Plateau border radius  $r_0$ ; we rewrite this as

$$r_0(\phi) = \frac{L}{\sqrt{\lambda c_g}} \sqrt{\phi} \quad (\text{S-3})$$

with geometrical constants  $c_g = \sqrt{3} - \pi/2$ ,  $\lambda = 3/(2\sqrt{2})$  (Kelvin),  $\lambda = 9/(2\sqrt{3})$  (fcc,hcp),  $L$  is the edge length of the corresponding dry foam polyhedron of volume  $\frac{4}{3}R^3\pi$ .

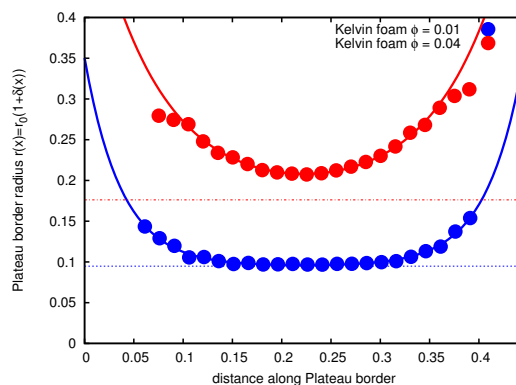

**Fig. S1** Variation of Plateau border radius  $r(x) = r_0(1 + \delta(x))$  between two vertices in a Kelvin foam at liquid fraction  $\phi = 0.01$  and  $\phi = 0.04$ . The data points are from Surface Evolver calculations (bubble volume 1), the solid line is a fit to eqns. (15) and (S-1), resulting in an estimate  $\alpha \simeq 0.9$ . The dashed lines indicate the respective values of  $r_0$ .

Using the area reduction per Plateau border, eqn. (20), we obtain

$$\Delta a_L(\phi)/(4\pi R^2) = -\frac{2\sqrt{3}-\pi}{4\pi\sqrt{c_g\lambda}} \left(\frac{L}{R}\right)^2 \sqrt{\phi}. \quad (\text{S-4})$$

The correction term (per Plateau border) due to the presence of the nodes, eqn. (22), may be written as a function of liquid fraction  $\phi$ ,

$$\Delta n_{L,\alpha,\beta}(\phi)/(4\pi R^2) = \frac{2\sqrt{3}-\pi}{4\pi} \frac{c_1}{\lambda c_g} \left(\frac{L}{R}\right)^2 \times (\alpha + \beta)\phi \left(1 - \exp\left[-\frac{\sqrt{\lambda c_g}}{c_1\sqrt{\phi}}\right]\right). \quad (\text{S-5})$$

In the following we will evaluate the above expressions for both a bubble in an fcc foam (S2.1), and in a Kelvin foam (S2.3).

**S2.1 Energy per bubble in an fcc foam**

The volume of a rhombic dodecahedron of side length  $L$  is given by  $V = 16\sqrt{3}/9L^3$ , resulting in  $L/R = \left(\frac{\pi\sqrt{3}}{4}\right)^{1/3}$ . The surface area is  $A = (8\sqrt{2})L^2$ , leading to the normalised dry foam energy  $E_{dry} = A/(4\pi R^2) = \frac{8\sqrt{2}}{4\pi}(L/R)^2 \simeq 1.10534$  for an fcc cell with flat faces.

In an fcc foam there are  $24/3=8$  Plateau borders per bubble. From eqn. (S-4) the first energy correction term is thus given by  $8\Delta a_L(\phi)/(4\pi R^2) = E_1\sqrt{\phi}$  with  $E_1 \simeq -0.3894$ .

Each Plateau border connects two different types of nodes, corresponding to the vertex angles  $\theta_\alpha = \cos^{-1}(-1/3) \simeq 109.47^\circ$  and  $\theta_\beta = \cos^{-1}(1/3) \simeq 70.53^\circ$ . The node correction per bubble is thus given by  $8\Delta n_{L,\alpha,\beta}(\phi)$ , see eqn. (S-5). This results in the final form for the node correction as  $E_2\phi(1 - e^{-E_3/\sqrt{\phi}})/(4\pi R^2)$  with  $E_2 \simeq 0.305(\alpha + \beta)$  and  $E_3 = \sqrt{c_g\lambda}/c_1 \simeq 1.646$ , where the sum  $\alpha + \beta$  needs to be determined from a one-parameter least square fit.

Figure 12 shows the Surface Evolver result for the excess energy of a bubble in an fcc foam bubble,  $\epsilon(\phi) = E(\phi)/(4\pi R^2\gamma) - 1$ , as a function of liquid fraction  $\phi$ . The data is well described by the one parameter fit to the energy expansion of eqn. (S-2), resulting in  $\alpha + \beta = 1.29 \pm 0.02$ .

Inserting  $\alpha \simeq 0.9$  (from the fit of the Plateau border profile for a Kelvin foam, Appendix S1) results in  $\beta \simeq 0.4$ ; inserting  $\alpha \simeq 0.56$

(from the value obtained for the energy of a Kelvin foam, S2.3) results in  $\beta \simeq 0.7$ .

## S2.2 Energy difference between fcc and hcp foams

The calculation of the node correction for a bubble in the hcp structure is slightly more elaborate. Of its 24 edges, 18 are identical to those in fcc, while 3 edges have an  $\alpha$  node at each end and length  $\frac{4}{3}L$ , and the remaining 3 edges have a  $\beta$  node at each end and length  $\frac{2}{3}L$ . This results in the following node correction per bubble,  $\frac{1}{3} \left( 18\Delta n_{L,\alpha,\beta}(r_0) + 3\Delta n_{\frac{4}{3}L,\alpha,\alpha}(r_0) + 3\Delta n_{\frac{2}{3}L,\beta,\beta}(r_0) \right)$ .

The difference per bubble between the fcc and hcp node corrections is then readily computed as  $2\Delta n_{L,\alpha,\beta} - \Delta n_{\frac{4}{3}L,\alpha,\alpha}(r_0) - \Delta n_{\frac{2}{3}L,\beta,\beta}(r_0)$ .

Inserting for the node correction terms *per Plateau border*,  $\Delta n$ , eqn. (22), and using eqn. (19) for relating  $r_0$  to  $\phi$  results in the following expression for the energy difference between fcc and hcp as a function of liquid fraction  $\phi$ ,

$$(E_{fcc}(\phi) - E_{hcp}(\phi))/(4\pi R^2) = E_4 \phi \exp \left[ -E_3/\sqrt{\phi} \right] \times \left[ \alpha \left( \exp \left[ -E_3/(3\sqrt{\phi}) \right] - 1 \right) + \beta \left( \exp \left[ +E_3/(3\sqrt{\phi}) \right] - 1 \right) \right]. \quad (\text{S-6})$$

The constants are given by  $E_3 = \sqrt{c_g \lambda}/c_1 \simeq 1.646$  (the value of  $E_3$  for the fcc foam) and  $E_4 = \frac{2\sqrt{3}-\pi}{\pi} \frac{c_1}{\lambda c_g} \left( \frac{L}{R} \right)^2 \simeq 0.059$ .

A two-parameter fit to eqn. (S-6) is shown in figure 13, resulting in  $\alpha = 0.82 \pm 0.02$  and  $\beta = 0.20 \pm 0.01$ . This is roughly consistent with the values obtained in the other estimates, see table 1.

## S2.3 Kelvin foam

### S2.3.1 Energy

The volume of Kelvin's tetrakaidecahedron of side length  $L$  is given by  $V = 8\sqrt{2}L^3$ , resulting in  $L/R = \left( \frac{\pi}{6\sqrt{2}} \right)^{1/3}$ . The surface area is  $A = (6 + 12\sqrt{3})L^2$ , leading to the normalised dry foam energy  $E_{dry} = A/(4\pi R^2) = \frac{6+12\sqrt{3}}{4\pi} (L/R)^2 \simeq 1.0990$  for a Kelvin cell with flat faces. Energy minimisation using the Surface Evolver results in  $E_{dry} \simeq 1.09725$ .

In a Kelvin foam there are 12 Plateau borders per bubble. From eqn. (S-4) the first energy correction term is thus given by  $12\Delta a_L(\phi)/(4\pi R^2) = E_1\sqrt{\phi}$  with  $E_1 \simeq -0.384$ .

In the Kelvin structure all vertex angles are identical, the energy correction due to the nodes is thus given by  $12\Delta n_{L,\alpha,\alpha}(\phi)$ , see eqn. (S-5). This results in the final form for the node correction as  $E_2\phi(1 - e^{-E_3/\sqrt{\phi}})/(4\pi R^2)$  with  $E_2 \simeq 0.183\alpha$  and  $E_3 = \sqrt{c_g \lambda}/c_1 \simeq 1.051$ , where the node constant  $\alpha$  needs to be determined from a least square fit.

Figure S2 shows the Surface Evolver result for the excess energy of a Kelvin bubble,  $\varepsilon(\phi) = E(\phi)/(4\pi R^2\gamma) - 1$ , as a function of liquid fraction  $\phi$ . The data is well described by the one-parameter fit to the energy expansion of eqn. (S-2) over the entire range of stability of this structure. The value of the node constant  $\alpha \simeq 0.56$ , is lower than the estimate of this constant as obtained from fitting the Plateau border profile ( $\alpha \simeq 0.9$ , see Figure S1).

### S2.3.2 Further estimate of node constant $\alpha$

There is yet a further route for establishing a value of the node constant  $\alpha$  in a Kelvin foam. Phelan *et al.*<sup>36</sup> obtained an expression for  $\phi$  as a function of  $r_0$  from a Surface Evolver computation of the volume of a single four-fold node, i.e. the node of the Kelvin

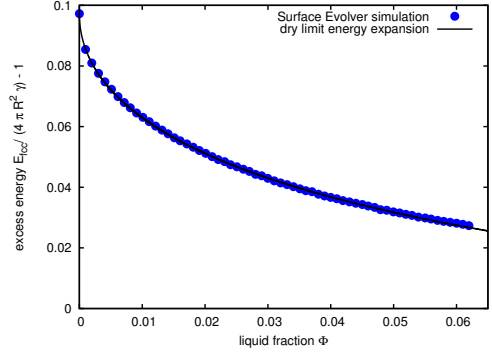

**Fig. S2** Excess energy  $\varepsilon(\phi) = E(\phi)/(4\pi R^2\gamma) - 1$  as a function of liquid fraction  $\phi$  for a bubble in a Kelvin structure. The black line results from a one-parameter fit to the dry limit energy expansion, eqn. (S-2), resulting in the node-constant  $\alpha \simeq 0.56 \pm 0.01$ .

structure. A more accurate result (obtained in the same way) is due to Koehler *et al.*<sup>37</sup> who obtained,

$$\phi = \lambda c_g (r_0/L)^2 \left( 1 + 1.17 \frac{r_0}{L} \right), \quad (\text{S-7})$$

with  $\lambda = 3/(2\sqrt{2})$  for the Kelvin structure, see section S2.

Such a relation may also be obtained from

$$\phi = \lambda c_g L^{-2} \langle r^2(x) \rangle = \lambda c_g L^{-1} \int_0^L r^2(x) dx, \quad (\text{S-8})$$

with  $r(x) = r_0(1 + \delta(x))$ . Evaluating the integral to lowest order in  $\delta(x)$  results in

$$\phi = \lambda c_g (r_0/L)^2 \left( 1 + \frac{2}{L} \int_0^L \delta(x) dx \right), \quad (\text{S-9})$$

and thus

$$\phi \simeq \lambda c_g (r_0/L)^2 \left( 1 + 4c_1 \alpha \frac{r_0}{L} (1 - \exp[-L/(c_1 r_0)]) \right) \simeq \lambda c_g (r_0/L)^2 \left( 1 + 4c_1 \alpha \frac{r_0}{L} \right) \quad (\text{S-10})$$

Comparing with the expression by Koehler *et al.*<sup>37</sup>, eqn. (S-7), we can thus identify  $4c_1\alpha = 1.17$ . This leads to  $\alpha \simeq 0.75$ , again consistent with the other estimates for  $\alpha$  reported above.
